# Supplementary material for: One-Year All-Cause Mortality and Delivery of the Collaborative Chronic Care Model in General Mental Health Clinics
Source: Atypon-hosted journal article supplement (doi:10.1176/appi.ps.20220428), 2023-04-05
Supplement: appi.ps.20220428.ds001.pdf [file appi.ps.20220428.ds001.pdf]

**All-Cause Death Frequencies by Characteristic—Stratified by Treatment Group**

| Characteristic                         | Controls, N = 869 <sup>a</sup> |     | CCM, N = 84 <sup>a</sup> |     | p-value <sup>b</sup> |
|----------------------------------------|--------------------------------|-----|--------------------------|-----|----------------------|
|                                        | N                              | %   | N                        | %   |                      |
| <b>Age group</b>                       |                                |     |                          |     | 0.3                  |
| ≤59                                    | 246                            | 28  | 28                       | 33  |                      |
| ≥60                                    | 623                            | 72  | 56                       | 67  |                      |
| <b>Female</b>                          | 42                             | 4.8 | 6                        | 7.1 | 0.3                  |
| <b>Non-white &amp; non-Latinx</b>      | 191                            | 22  | 13                       | 15  | 0.2                  |
| <b>50% disabled</b>                    | 520                            | 60  | 54                       | 64  | 0.4                  |
| <b>Employed</b>                        | 498                            | 57  | 40                       | 48  | 0.087                |
| <b>Married</b>                         | 338                            | 39  | 34                       | 40  | 0.8                  |
| <b>Rural residence</b>                 |                                |     |                          |     | 0.5                  |
| Rural                                  | 271                            | 31  | 29                       | 35  |                      |
| Urban                                  | 598                            | 69  | 55                       | 65  |                      |
| <b>Anxiety</b>                         | 244                            | 28  | 28                       | 33  | 0.3                  |
| <b>Bipolar</b>                         | 172                            | 20  | 31                       | 37  | <.001                |
| <b>Depression</b>                      | 335                            | 39  | 42                       | 50  | 0.04                 |
| <b>Personality disorder</b>            | 35                             | 4   | 4                        | 4.8 | 0.8                  |
| <b>PTSD</b>                            | 274                            | 32  | 35                       | 42  | 0.058                |
| <b>Schizophrenia</b>                   | 70                             | 8.1 | 11                       | 13  | 0.11                 |
| <b>Substance use diagnosis</b>         | 247                            | 28  | 18                       | 21  | 0.2                  |
| <b>TBI</b>                             | 9                              | 1   | 2                        | 2.4 | 0.3                  |
| <b>Medical morbidity</b>               |                                |     |                          |     | 0.7                  |
| >1 med, morbidity                      | 470                            | 54  | 42                       | 50  |                      |
| No med morbidity                       | 199                            | 23  | 20                       | 24  |                      |
| Single med morbidity                   | 200                            | 23  | 22                       | 26  |                      |
| <b>Psychiatric comorbidities</b>       |                                |     |                          |     | 0.3                  |
| 3 or fewer psych diagnoses             | 683                            | 79  | 62                       | 74  |                      |
| Over 3 psych diagnoses                 | 186                            | 21  | 22                       | 26  |                      |
| <b>Past year med hospitalization</b>   | 116                            | 13  | 17                       | 20  | 0.082                |
| <b>Past year psych hospitalization</b> | 44                             | 5.1 | 3                        | 3.6 | 0.8                  |
| <b>Site</b>                            |                                |     |                          |     | <.001                |
| Site 1                                 | 110                            | 13  | 13                       | 15  |                      |
| Site 2                                 | 168                            | 19  | 2                        | 2.4 |                      |
| Site 3                                 | 73                             | 8.4 | 5                        | 6   |                      |
| Site 4                                 | 82                             | 9.4 | 8                        | 9.5 |                      |
| Site 5                                 | 58                             | 6.7 | 22                       | 26  |                      |
| Site 6                                 | 105                            | 12  | 8                        | 9.5 |                      |
| Site 7                                 | 46                             | 5.3 | 12                       | 14  |                      |
| Site 8                                 | 98                             | 11  | 9                        | 11  |                      |
| Site 9                                 | 129                            | 15  | 5                        | 6   |                      |

<sup>a</sup> n (%)<sup>b</sup> Pearson's Chi-squared test;  
Fisher's exact test
